# Supplementary material for: Selective synthesis of α-Fe2O3 thin films and effect of the deposition temperature and lattice oxygen on the catalytic combustion of propene
Source: Royal Society of Chemistry journal article supplement (doi:10.1039/c3ta11354j), 2013-01-01
Supplement: c3ta11354j.pdf [file c3ta11354j.pdf]

## Electronic Supplementary Information (ESI)

# Selective synthesis of $\alpha$ -Fe<sub>2</sub>O<sub>3</sub> thin films and effect of the deposition temperature and lattice oxygen on the catalytic combustion of propene

Patrick Mountapmbeme Kouotou,<sup>a</sup> Zhen-Yu Tian,<sup>a,\*</sup> Henning Vieker,<sup>b</sup> André Beyer,<sup>b</sup> Armin Götzhäuser,<sup>b</sup>

Katharina Kohse-Höinghaus<sup>a</sup>

<sup>a</sup>Department of Chemistry 1, Bielefeld University, Universitätsstraße 25, D-33615 Bielefeld, Germany

<sup>b</sup>Department of Physics, Bielefeld University, Universitätsstraße 25, D-33615, Bielefeld, Germany

\* Corresponding author. Tel: +49-521 106 2199, Fax: +49-521 106 6027; E-mail: [zhenyu.tian@uni-bielefeld.de](mailto:zhenyu.tian@uni-bielefeld.de).

**Table ESI 1** Experimental conditions for the preparation of  $\alpha$ -Fe<sub>2</sub>O<sub>3</sub>

|                            |                                             |
|----------------------------|---------------------------------------------|
| Precursor                  | Fe(acac) <sub>3</sub>                       |
| Solvent                    | Tetrahydrofuran                             |
| Concentration of precursor | 5 mM                                        |
| Frequency                  | 4 Hz                                        |
| Opening time               | 2 ms                                        |
| Evaporation temperature    | 220 °C                                      |
| Transportation temperature | 220 °C                                      |
| Substrate temperature      | 350 °C; 400 °C and 450 °C                   |
| Deposition pressure (mbar) | 25                                          |
| N <sub>2</sub> (SLM)       | 0.16                                        |
| O <sub>2</sub> (SLM)       | 1.0                                         |
| Substrates                 | Silicon, planar and mesh of stainless steel |

**Table ESI 2** Overview of the catalytic performance of the as-prepared  $\alpha$ -Fe<sub>2</sub>O<sub>3</sub> and some catalysts in the literature

| Material                                                              | Weight (mg) | Gas composition                                                          | WHSV <sup>a</sup> (ml g <sup>-1</sup> h <sup>-1</sup> ) | T <sub>10</sub> <sup>b</sup> (°C) | T <sub>50</sub> <sup>b</sup> (°C) | T <sub>90</sub> <sup>b</sup> (°C) | Ref.      |
|-----------------------------------------------------------------------|-------------|--------------------------------------------------------------------------|---------------------------------------------------------|-----------------------------------|-----------------------------------|-----------------------------------|-----------|
| $\alpha$ -Fe <sub>2</sub> O <sub>3</sub> 350 °C                       | 20          | 1% C <sub>3</sub> H <sub>6</sub> /10% O <sub>2</sub> in Ar               | 45000                                                   | 260                               | 313                               | 350                               | This work |
| $\alpha$ -Fe <sub>2</sub> O <sub>3</sub> 400 °C                       |             |                                                                          |                                                         | 295                               | 355                               | 400                               |           |
| $\alpha$ -Fe <sub>2</sub> O <sub>3</sub> 450 °C                       |             |                                                                          |                                                         | 302                               | 380                               | 435                               |           |
| Co <sub>3</sub> O <sub>4</sub>                                        | 12          | 1% C <sub>3</sub> H <sub>6</sub> /10% O <sub>2</sub> in Ar               | 75000                                                   | 306                               | 347                               | 396                               | [1]       |
| Co <sub>3</sub> O <sub>4</sub>                                        | 41.5        | 2% C <sub>3</sub> H <sub>6</sub> / 20%O <sub>2</sub> in Ar               | 73000                                                   | 293                               | 327                               | 356                               | [2]       |
| Co <sub>3</sub> O <sub>4</sub>                                        | 12          | 2% C <sub>3</sub> H <sub>6</sub> / 20%O <sub>2</sub> in Ar               | 75000                                                   | 325                               | 354                               | 385                               | [3]       |
| Co <sub>2.66</sub> Mn <sub>0.34</sub> O <sub>4</sub>                  | 12          | 2% C <sub>3</sub> H <sub>6</sub> / 20%O <sub>2</sub> in Ar               | 75000                                                   | 277                               | 321                               | 356                               | [3]       |
| Cu <sub>0.72</sub> Co <sub>2.28</sub> O <sub>4</sub>                  | 40          | 13% C <sub>3</sub> H <sub>6</sub> / 52%O <sub>2</sub> in N <sub>2</sub>  | 15000                                                   | 230                               | 275                               | >400                              | [4]       |
| Au/Al <sub>2</sub> O <sub>3</sub>                                     | 200         | 1.5% C <sub>3</sub> H <sub>6</sub> / 4% O <sub>2</sub> in He             | 22500                                                   | 288                               | 349                               | 410                               | [5]       |
| Au/Al <sub>2</sub> O <sub>3</sub>                                     | 200         | 1% C <sub>3</sub> H <sub>6</sub> / 9% O <sub>2</sub> in He               | 219512                                                  | -                                 | 365                               | -                                 | [6]       |
| Au/BaO/Al <sub>2</sub> O <sub>3</sub>                                 | 200         | 1% C <sub>3</sub> H <sub>6</sub> / 9% O <sub>2</sub> in He               | 250000                                                  | -                                 | 290                               | -                                 | [6]       |
| Au/Rb <sub>2</sub> O/Al <sub>2</sub> O <sub>3</sub>                   | 200         | 1% C <sub>3</sub> H <sub>6</sub> / 9% O <sub>2</sub> in He               | 257143                                                  | -                                 | 307                               | -                                 | [6]       |
| Au/Li <sub>2</sub> O/Al <sub>2</sub> O <sub>3</sub>                   | 200         | 1% C <sub>3</sub> H <sub>6</sub> / 9% O <sub>2</sub> in He               | 225000                                                  | -                                 | 327                               | -                                 | [6]       |
| Au/MgO/Al <sub>2</sub> O <sub>3</sub>                                 | 200         | 1% C <sub>3</sub> H <sub>6</sub> / 9% O <sub>2</sub> in He               | 214286                                                  | -                                 | 359                               | -                                 | [6]       |
| Ag/Al <sub>2</sub> O <sub>3</sub>                                     | 50          | 3% C <sub>3</sub> H <sub>6</sub> / 10% O <sub>2</sub> in N <sub>2</sub>  | 12000                                                   | -                                 | -                                 | 420                               | [7]       |
| La <sub>1.7</sub> Sr <sub>0.3</sub> CuO <sub>4</sub> S <sub>0.2</sub> | 200         | 0.1% C <sub>3</sub> H <sub>6</sub> / 5% O <sub>2</sub> in N <sub>2</sub> | 30000                                                   | 368                               | 419                               | 500                               | [8]       |
| Non-coated mesh                                                       | -           | 1% C <sub>3</sub> H <sub>6</sub> /10% O <sub>2</sub> in Ar               | -                                                       | 381                               | 550                               | 680                               | This work |

Note: <sup>a</sup> WHSV is weight hourly space velocity; <sup>b</sup> T<sub>10</sub>, T<sub>50</sub> and T<sub>90</sub> refer to the temperatures at which 10%, 50% and 90% propene is converted, respectively.

The table ESI 2 presents an overview of the catalytic performance of the as-prepared  $\alpha$ -Fe<sub>2</sub>O<sub>3</sub> and selected catalysts in the literature. Special attention is devoted to the comparison of the catalytic performance with noble metals and transition metals oxides. As crucial factors, the weights of the catalyst and the WHSV have been taken in account. Even though the experimental conditions are somewhat different, it can be seen from the table that both groups give similar results with the respect to the oxidation of propene. As pointed out in our recent work, Co<sub>3</sub>O<sub>4</sub> and Co-based mixed oxide are very active. Up to now, only few studies involved iron oxide, especially hematite, for propene conversion. As mentioned in the introduction, iron compounds are abundantly available

and have attractive consideration attention because of their properties such as high thermodynamic stability and low cost; also, they are environmentally friendly. Therefore,  $\alpha$ -Fe<sub>2</sub>O<sub>3</sub> presents significant advantages over others transition metal oxides. In summary, as demonstrated here, hematite investigated in the present study can be successfully synthesized and is very active for VOCs conversion.

### *Carbon species analysis*

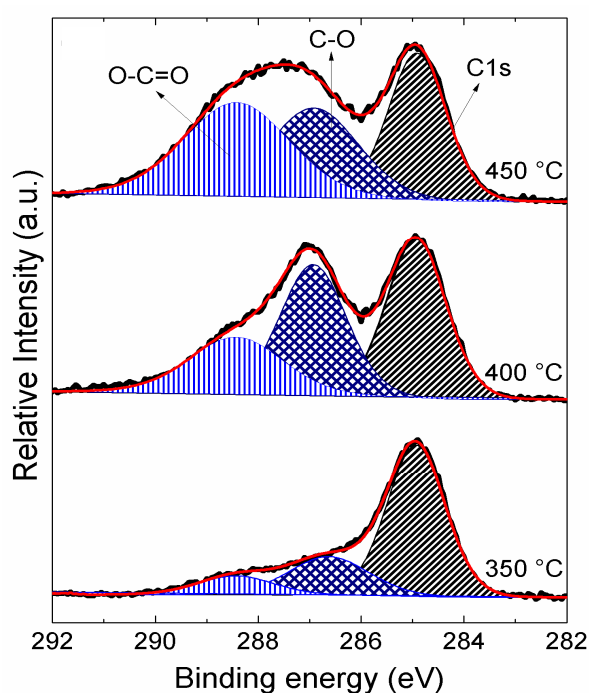

**Fig. ESI 1** XPS spectra of C1s core shell present on  $\alpha$ -Fe<sub>2</sub>O<sub>3</sub>. Thin and thick lines are fitted and experimental results, respectively.

Figure ESI 1 shows the C1s signal, in which three observed peaks are resolved into three components corresponding to adventitious carbon, C–O, and O–C=O moieties, respectively. The observed peaks confirmed the presence of a large amount amounting of carbonaceous species at the surface of the as-prepared  $\alpha$ -Fe<sub>2</sub>O<sub>3</sub>, which are in excellent agreement with results of the oxygen signals.

*Morphology inspection of hematite sample prepared at 350 °C and 450 °C, before and after the catalytic test*

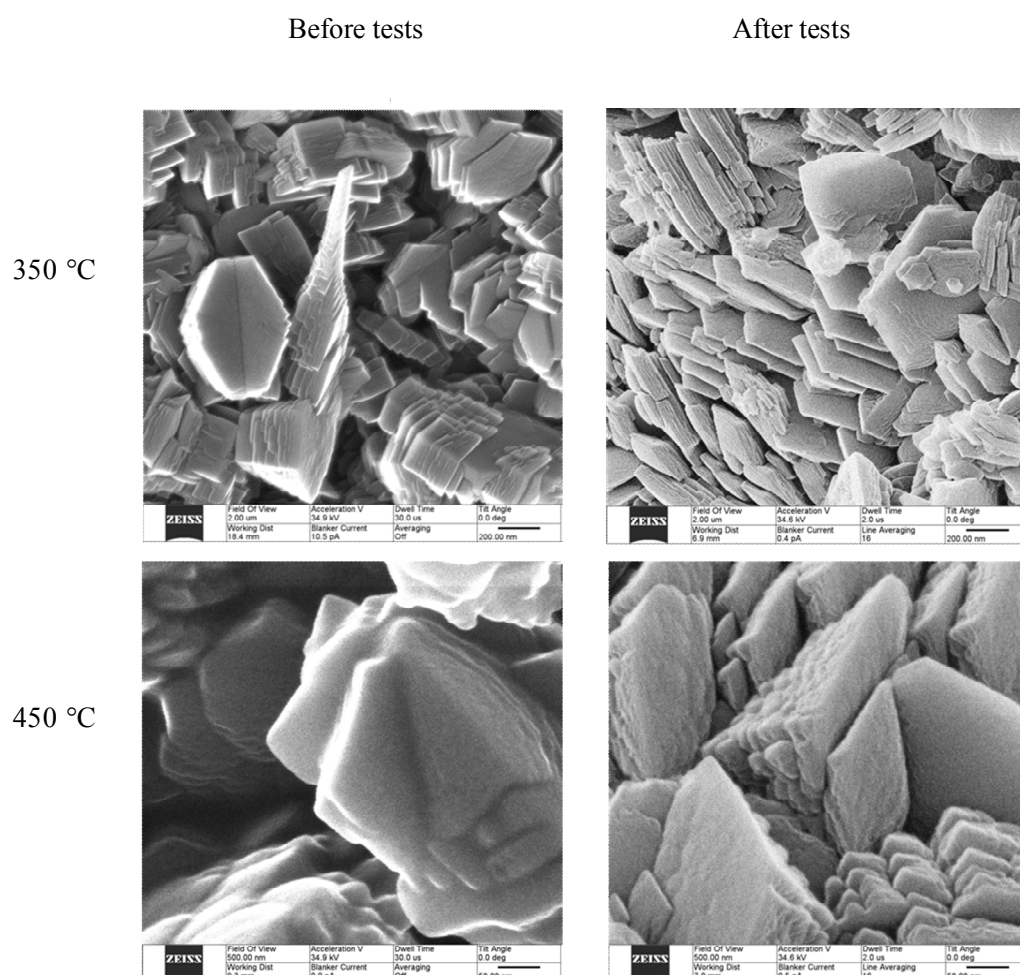

**Fig. ESI 2** High magnification HIM images of hematite prepared at 350 °C and 450 °C before and after the catalytic tests.

### Comparison of XPS results of hematite samples before and after the catalytic test

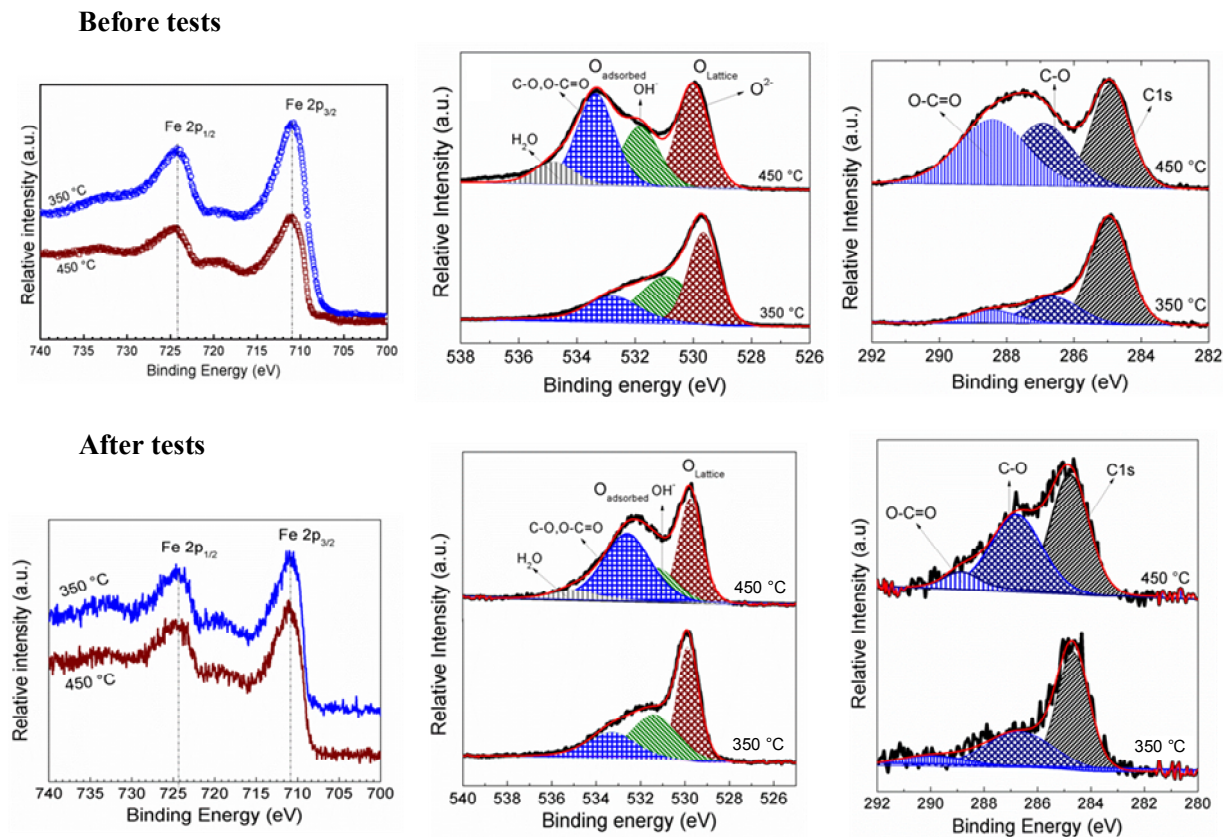

**Fig. ESI 3** XPS spectra of of hematite prepared at 350 °C and 450 °C before and after the catalytic tests. The high noise in the “after tests” measurements was due to a substantially lower X-ray source intensity.

As can be seen from Figs. ESI 2 and 3, the fim morphology and surface composition remain quite similar for the samples before and after the catalytic test. Together with the reproducibility results in Fig. 8b, it can be predicted that the catalytic properties are not largely affected, which is also supported by the present morphology and composition results.

### *Brief description of the PSE-CVD reactor*

The growth of  $\alpha\text{-Fe}_2\text{O}_3$  thin films was performed in a cold-wall stagnation point-flow CVD reactor, which is associated with a homemade PSE unit for the control delivery of liquid precursor feedstock. The reactor consists of three detachable parts: the evaporation zone (part I), carrier and transport gas zone (Part II) located above the cold-wall CVD chamber in which a flat heater (part III) is placed over the ceramic blocks. All parts were heated separately, and their temperatures were controlled by a temperature control unit (HT-60, Horst).

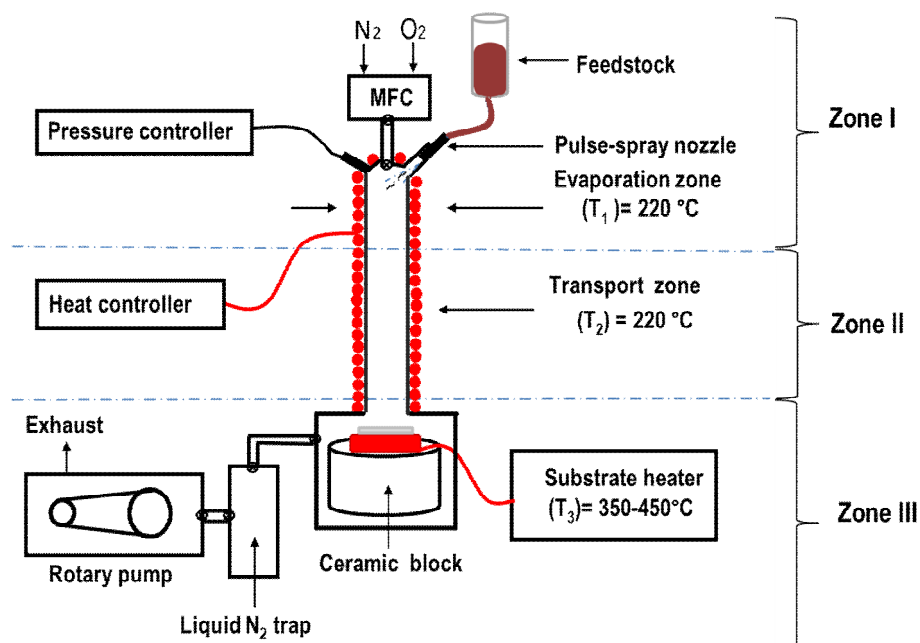

**Fig. ESI 4** PSE-CVD reactor used for the synthesis of hematite.

### Flow reactor use for the catalytic test

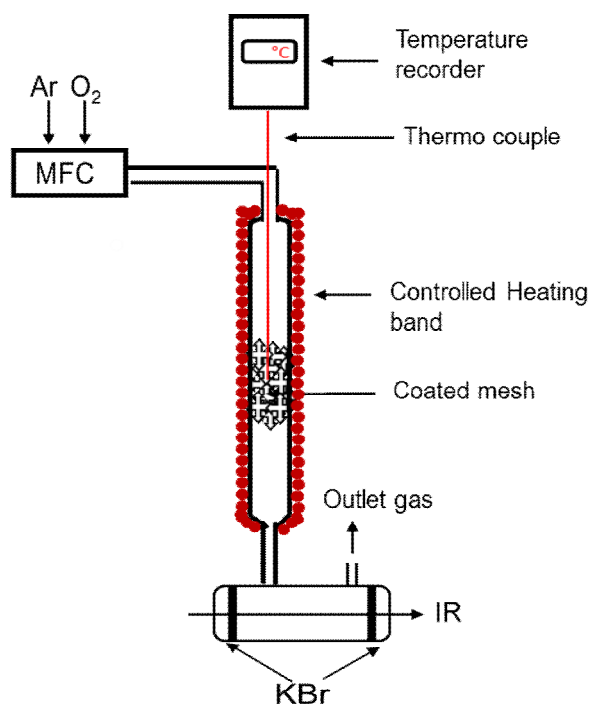

**Fig. ESI 5** Schematic representation of the flow-reactor used for catalytic test.

### References (ESI)

- [1] P. Mountapmbeme Kouotou, Z.Y. Tian, U. Mundloch, N. Bahlawane, K. Kohse-Höinghaus, *RSC Adv.*, 2012, **2**, 10809-10812.
- [2] Z. Y. Tian, N. Bahlawane, F. Qi, K. Kohse-Höinghaus, *Catal. Commun.*, 2009, **11**, 118-122.
- [3] Z. Y. Tian, P. H. Tchoua Ngamou, V. Vannier, K. Kohse-Höinghaus, N. Bahlawane, *Appl. Catal. B: Environ.*, 2012, **117-118**, 125-134.
- [4] H. Baussart, R. Delobel, M. Le Bras, J. M. Leroy, *J. Chem. Soc., Faraday Trans. I*, 1979, **75**, 1337-1345.
- [5] S. Ivanova, C. Petit, V. Pitchon, *Gold Bull.*, 2006, 39, 3-8.
- [6] A. C. Gluhoi, N. Bogdanchikova, B. E. Nieuwenhuys, *J. Catal.*, 2005, **232**, 96-101.
- [7] R. Zhang, H. Alamdari, S. Kaliaguine, *Catal. Lett.*, 2007, **119**, 108.
- [8] M. Machida, K. Ochiai, K. Ito, K. Ikeue, *J. Catal.*, 2006, **238**, 58-66.
